# Supplementary material
Source: PubMed Central journal article supplement (PMC3805028)
Supplement: NIHMS88543-supplement-Supplemental.pdf [file NIHMS88543-supplement-Supplemental.pdf]

## SUPPLEMENTARY INFORMATION

Figure S1

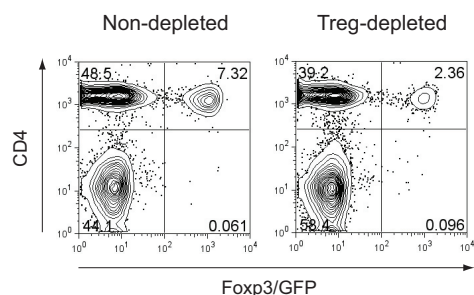

**Figure S1: Treatment with a monoclonal antibody to CD25 depletes more than 50% of Foxp3<sup>+</sup> T-reg.** *Il6*<sup>-/-</sup> × *Foxp3gfp*.KI mice were treated with rat IgG1 (non-depleted) or anti-CD25 antibody (PC61) by intraperitoneal injection of 500 μg on days -5 and -3 prior to immunisation with MOG<sub>35-55</sub> in complete Freund's adjuvant. Seven days after immunisation, lymph node cells were isolated, stained for CD4 and analysed by flow cytometry for the presence of CD4<sup>+</sup>Foxp3/GFP<sup>+</sup> T-cells. The numbers in the quadrants represent percentages.

Figure S2

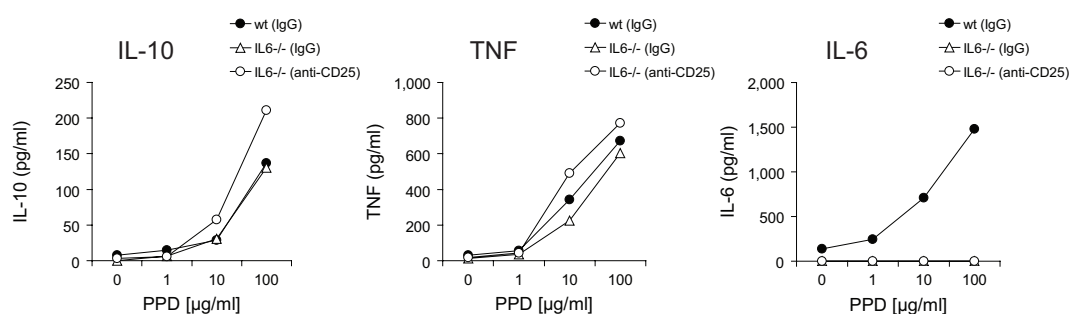

**Figure S2: *Il6*<sup>-/-</sup> mice do not exhibit residual IL-6 production.** Wildtype, *Il6*<sup>-/-</sup>, or T-reg-depleted (anti-CD25) *Il6*<sup>-/-</sup> mice were immunised with MOG<sub>35-55</sub> emulsified in complete Freund's adjuvant. Six days after immunisation, splenocytes were isolated and re-stimulated in vitro with increasing concentrations of purified protein derivative from *M. tuberculosis* (PPD). Since *M. tuberculosis* is the major constituent of the immunising emulsion, we re-activated the splenocyte cultures

with PPD to induce a maximum response and to determine whether under these conditions *Il6*<sup>-/-</sup> mice would show any indication of residual IL-6 production. After 48 h supernatants were collected and assayed for IL-10, TNF, and IL-6 by cytometric bead array. Splenocytes from *Il6*<sup>-/-</sup> mice continued to produce IL-10 and TNF, but failed to produce any IL-6. Furthermore, prior depletion of T-reg did not result in IL-6 production from splenocytes of *Il6*<sup>-/-</sup> mice either.

Figure S3

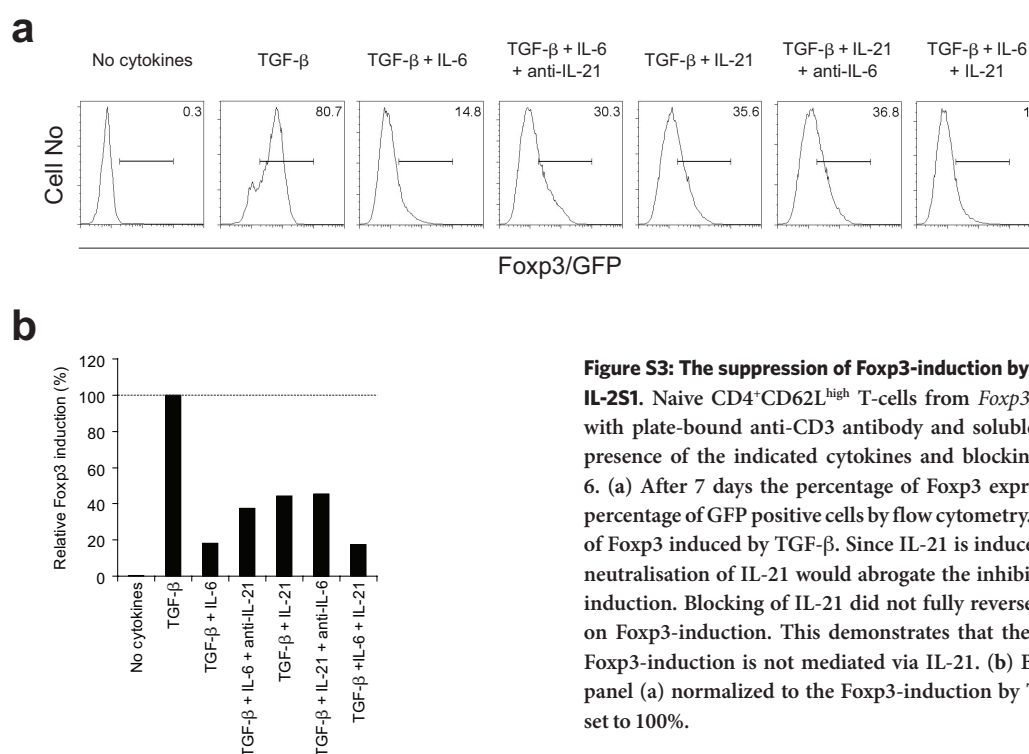

**Figure S3: The suppression of Foxp3-induction by IL-6 is not mediated through IL-2S1.** Naive CD4<sup>+</sup>CD62L<sup>high</sup> T-cells from *Foxp3gfp*.KI mice were stimulated with plate-bound anti-CD3 antibody and soluble anti-CD28 antibody in the presence of the indicated cytokines and blocking antibodies to IL-21 or IL-6. (a) After 7 days the percentage of Foxp3 expressing cells was measured as percentage of GFP positive cells by flow cytometry. IL-6 inhibited the expression of Foxp3 induced by TGF-β. Since IL-21 is induced by IL-6, we tested whether neutralisation of IL-21 would abrogate the inhibitory effect of IL-6 on Foxp3-induction. Blocking of IL-21 did not fully reverse the inhibitory effect of IL-6 on Foxp3-induction. This demonstrates that the inhibitory effect of IL-6 on Foxp3-induction is not mediated via IL-21. (b) Bar graph of the results from panel (a) normalized to the Foxp3-induction by TGF-β, which was arbitrarily set to 100%.

Figure S4

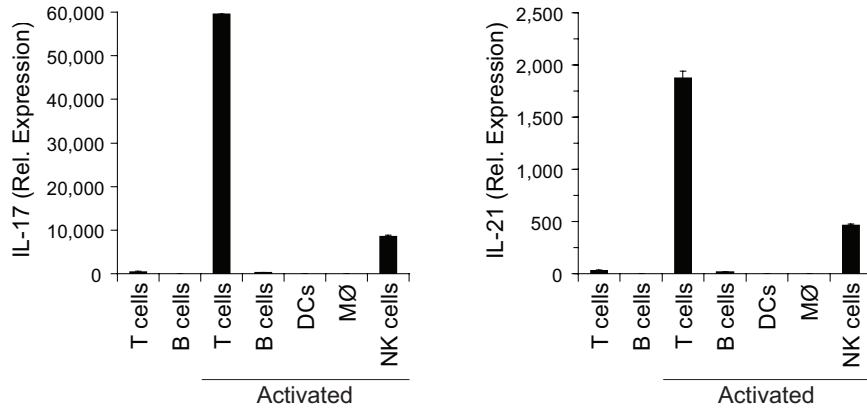

**Figure S4: T-cells are the major source of IL-21 in T-reg-depleted *Il6*<sup>-/-</sup> mice.** *Il6*<sup>-/-</sup> mice were depleted of T-reg by injection of anti-CD25 antibody followed by immunisation with MOG<sub>35-55</sub> emulsified in CFA (as described in Figure 2). Seven days after immunisation, different cell types were purified from pooled draining lymph node cells and splenocytes by flow cytometry sorting. T-cells

(Thy1.2<sup>+</sup>) were activated with PMA/ionomycin and B cells (CD19<sup>+</sup>), dendritic cells (CD11c<sup>+</sup>, DCs), macrophages (CD11b<sup>+</sup>, MØ), and NK cells (NK1.1<sup>+</sup>) were activated with LPS before isolation of RNA for quantitative RT-PCR to determine the cell type-specific expression of IL-17 and IL-21. For comparison, T-cells and B cells were also analysed without *in vitro*-activation.

Figure S5

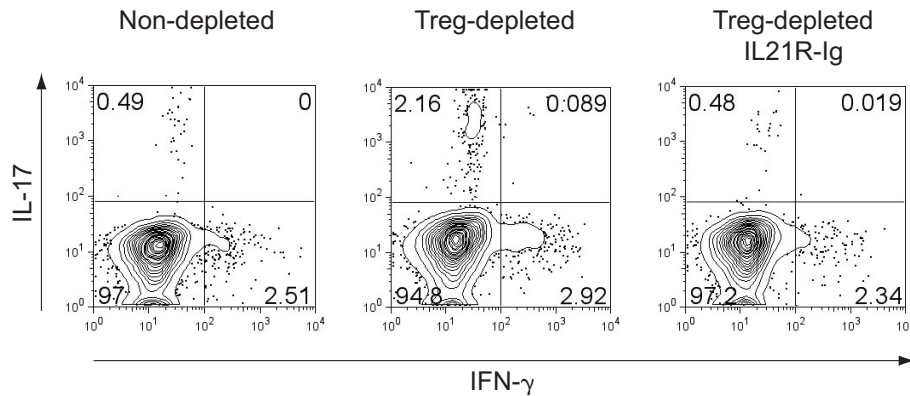

**Figure S5: *In vivo*-blocking of IL-21 inhibits the generation of Th17 cells in T-reg-depleted *Il6*<sup>-/-</sup> mice.** *Il6*<sup>-/-</sup> mice were treated with control rat IgG1 (non-depleted) or with anti-CD25 antibody to deplete T-reg (T-reg-depleted) followed by immunisation with MOG<sub>35-55</sub> emulsified in complete Freund's adjuvant. The T-reg depleted groups were either treated with PBS (control) or with IL-21 receptor-Ig (4 times 200 µg intraperitoneally every other day, starting

on the day of immunisation) in order to block IL-21-activity *in vivo*. On day 7 after immunisation, draining lymph node cells were isolated, stimulated with PMA/ionomycin, stained for intracellular IL-17 and IFN-γ, and analysed by flow cytometry. The gate is set on CD4<sup>+</sup>Foxp3<sup>-</sup>/GFP<sup>-</sup> T-cells. Numbers indicate percentages.
